# Supplementary material for: Pseudomonas aeruginosa cleaves the decoding center of Caenorhabditis elegans ribosomes
Source: PLoS Biol. 2020 Dec 1;18(12):e3000969. doi: 10.1371/journal.pbio.3000969 (PMC7707567; doi:10.1371/journal.pbio.3000969)
Supplement: S1 Table — (XLSX) [file pbio.3000969.s008.xlsx]

## Sheet: Table S1 C.elegans strains
Abbreviation	Abbreviation used in the manuscript
Genotype	Genotype of the strain
Strain	Strain nomenclature
Abbreviation	Genotype	Strain
wt	wildtype	N2
dyn-1(ts)	dyn-1(ky51) X.	CX51
ced-3(lf)	ced-3(n717) IV.	MT1522
irg-1:GFP	agIs17 [myo-2p::mCherry + irg-1p::GFP] IV.	AU133
NA	rde-1(ne219) V; kbIs7 [nhx-2p::rde-1 + rol-6(su1006)]	VP303
NA	lin-15(n765) Is[Pmyo-3::GFP::rpl-1 lin-15(+)]	JAC127
NA	lin-15(n765) Is[Pges-1::GFP::rpl-1 lin-15(+)]	JAC382
fshr-1(lf)	fshr-1(ok778) V.	RB911
zip-2(lf)	zip-2(tm4248) III.	NA
pmk-1(lf)	pmk-1(km25) IV.	KU25
NA	maIs105[col-19::GFP] V.	VT1367
hsp-4::GFP	hsp-4::GFP	VL809
hsp-6::GFP	hsp-6::GFP	NA
T24B8.5::GFP	T24B8.5::GFP	NA
NA	rde-1(ne219) V; kbIs7 ; agIs17	VT4003
